# Supplementary material
Source: HighWire-hosted journal article supplement (https://oem.bmj.com/content/81/1/9)
Supplement: inline-supplementary-material-1 [file inline-supplementary-material-1.pdf]

## SUPPLEMENTAL MATERIAL

### Content

- Table S1: Number of lung cancer cases by histological subtype
- Overview of study designs and exclusions by subtype
  - Figure S1a: Adenocarcinoma
  - Figure S1b: Squamous cell carcinoma
  - Figure S1c: Small cell carcinoma
- Directed acyclic graphs (DAGs)
  - Figure S2: DAG of Model 2
  - Figure S3: DAG of Model 3
  - Figure S4: DAG of Model 4
- Diesel exhaust exposure as a potential confounder – Model 4
  - Table S2: Model 4
  - Figure S5: Correlation between diesel exhaust and benzene.
  - Tables S3: Diesel exhaust exposure and lung cancer risk
  - Discussion of diesel exhaust as a potential confounder
- Analysis stratified by year of first employment
  - Table S4a: <1980
  - Table S4b: ≥1980
- Latency analyses with time-varying benzene exposure
  - Table S5a: Lagged analysis
  - Table S5b: Lagged analysis by histological subtype
  - Table S6: Most recent benzene exposure
  - Table S7: Time-varying benzene exposure during follow-up
- Table S8: Lung cancer risk according to employment duration
- Table S9. Spearman rank correlation coefficients ( $r_{sp}$ ) for occupational co-exposures

### Number of lung cancer cases by histological subtype

| <b>Table S1.</b> Number of lung cancer cases by histological subtype among 25,347 males in the Norwegian Offshore Petroleum Workers (NOPW) cohort followed 1999–2021.                                                   |                        |
|-------------------------------------------------------------------------------------------------------------------------------------------------------------------------------------------------------------------------|------------------------|
| <b>Cancer type</b>                                                                                                                                                                                                      | <b>Number of cases</b> |
| Lung (all cases)                                                                                                                                                                                                        | 399                    |
| Non-small cell carcinoma                                                                                                                                                                                                | 337                    |
| Adenocarcinoma <sup>1</sup>                                                                                                                                                                                             | 152                    |
| Squamous cell carcinoma <sup>2</sup>                                                                                                                                                                                    | 88                     |
| Large cell carcinoma <sup>3*</sup>                                                                                                                                                                                      | 9                      |
| Large cell neuroendocrine carcinoma <sup>4*</sup>                                                                                                                                                                       | 8                      |
| Non-small cell carcinoma UNS <sup>5*</sup>                                                                                                                                                                              | 44                     |
| Carcinoid <sup>6*</sup>                                                                                                                                                                                                 | 6                      |
| Other <sup>7*</sup>                                                                                                                                                                                                     | 9                      |
| Unknown <sup>8*</sup>                                                                                                                                                                                                   | 21                     |
| Small cell carcinoma <sup>9</sup>                                                                                                                                                                                       | 62                     |
| <sup>1-9</sup> Codes from the International Classification of Diseases Oncology 3 <sup>rd</sup> revision (ICD-O-3) used to classify histological subtypes of lung cancer.                                               |                        |
| <sup>1</sup> 7032, 7033, 7039, 7508, 8140, 8148, 8211, 8230, 8250, 8251, 8252, 8253, 8254, 8255, 8256, 8257, 8260, 8263, 8265, 8310, 8323, 8333, 8410, 8460, 8470, 8480, 8481, 8490, 8550, 8551, 8570, 8574, 8576, 8940 |                        |
| <sup>2</sup> 8052, 8070, 8071, 8072, 8073, 8074, 8075, 8076, 8077, 8082                                                                                                                                                 |                        |
| <sup>3</sup> 8012                                                                                                                                                                                                       |                        |
| <sup>4</sup> 8013                                                                                                                                                                                                       |                        |
| <sup>5</sup> 7160, 7161, 8010, 8020, 8046;                                                                                                                                                                              |                        |
| <sup>6</sup> 8240, 8241, 8243, 8245, 8249 ;                                                                                                                                                                             |                        |
| <sup>7</sup> 8022, 8030, 8031, 8032, 8033, 8040, 8083, 8123, 8140, 8200, 8244, 8246, 8250, 8430, 8560, 8562, 8973, 8980,                                                                                                |                        |
| <sup>8</sup> 8000, 8001                                                                                                                                                                                                 |                        |
| <sup>9</sup> 8041                                                                                                                                                                                                       |                        |
| *Not analysed separately                                                                                                                                                                                                |                        |

## Overview of study designs and exclusions by subtype

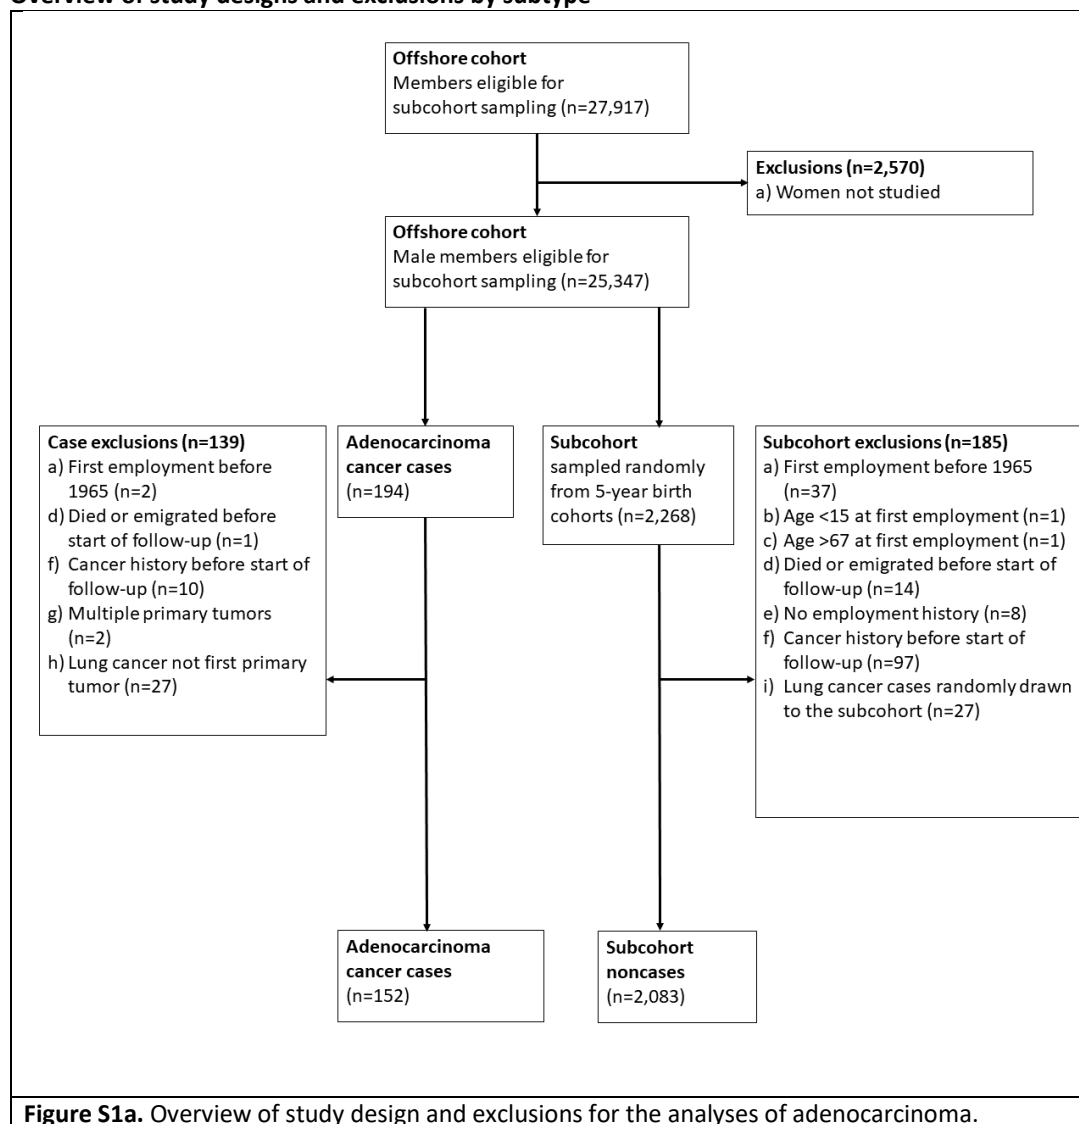

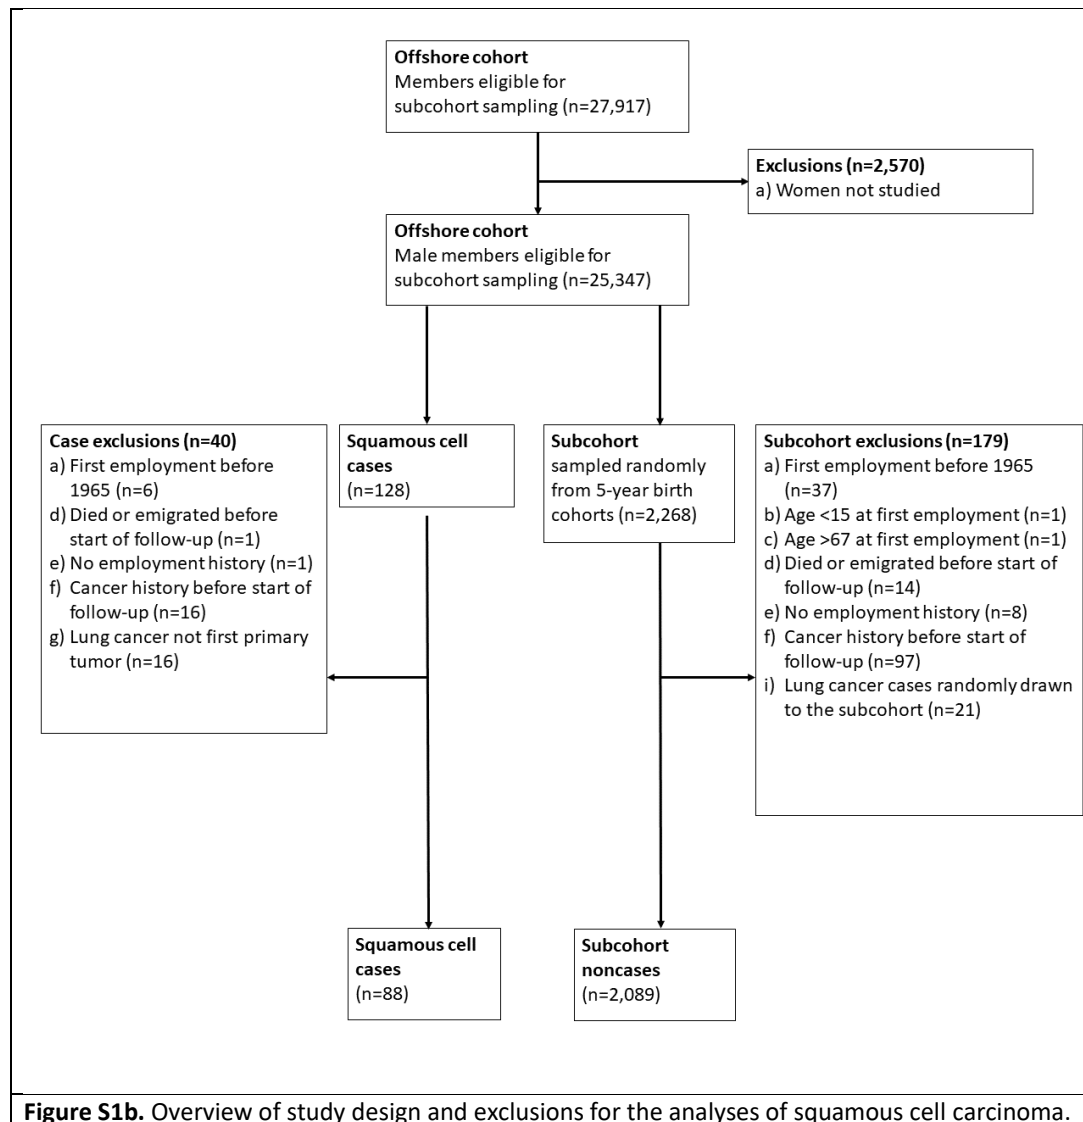

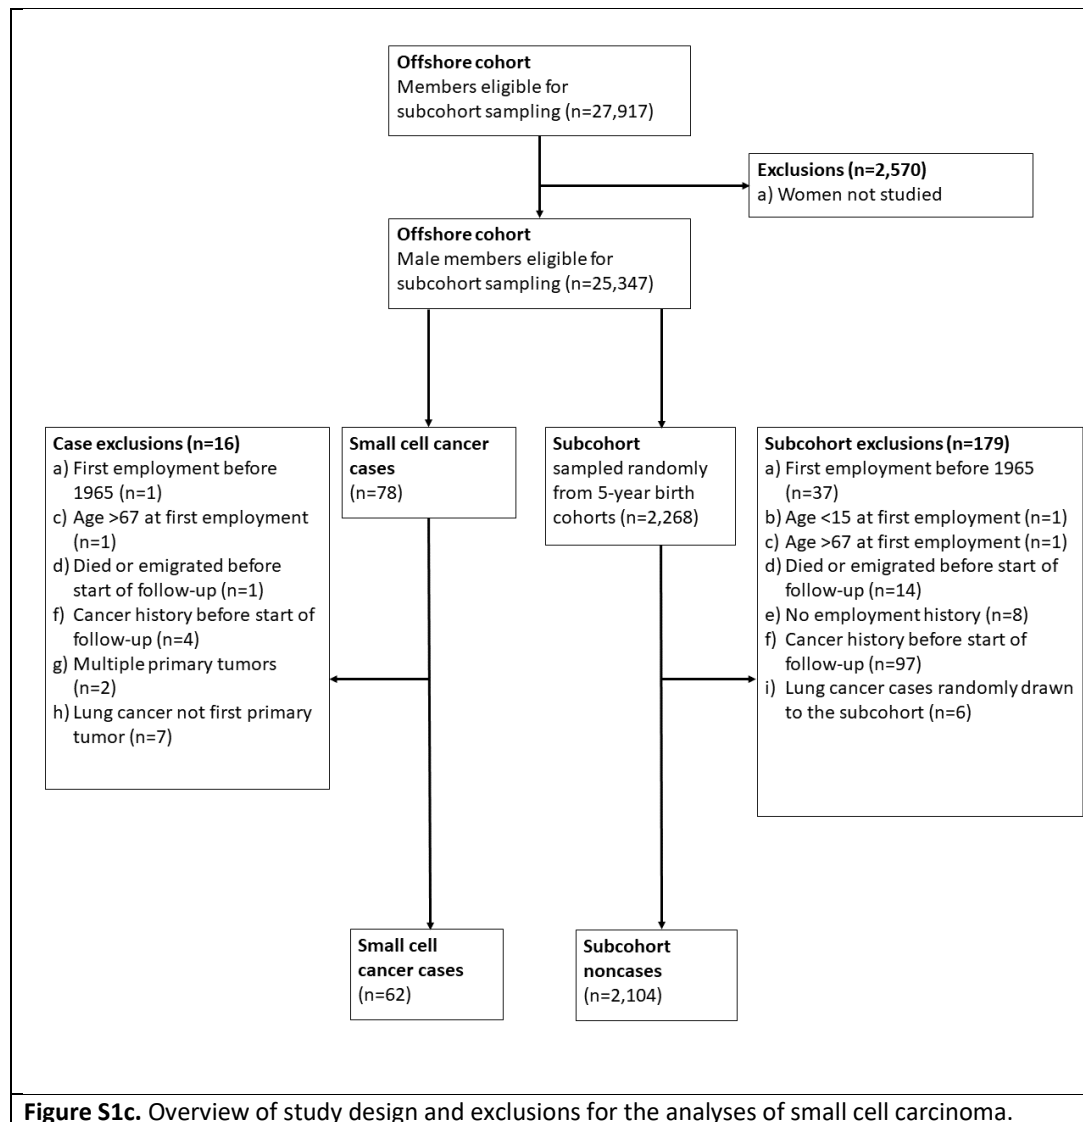

## Directed acyclic graphs (DAGs)

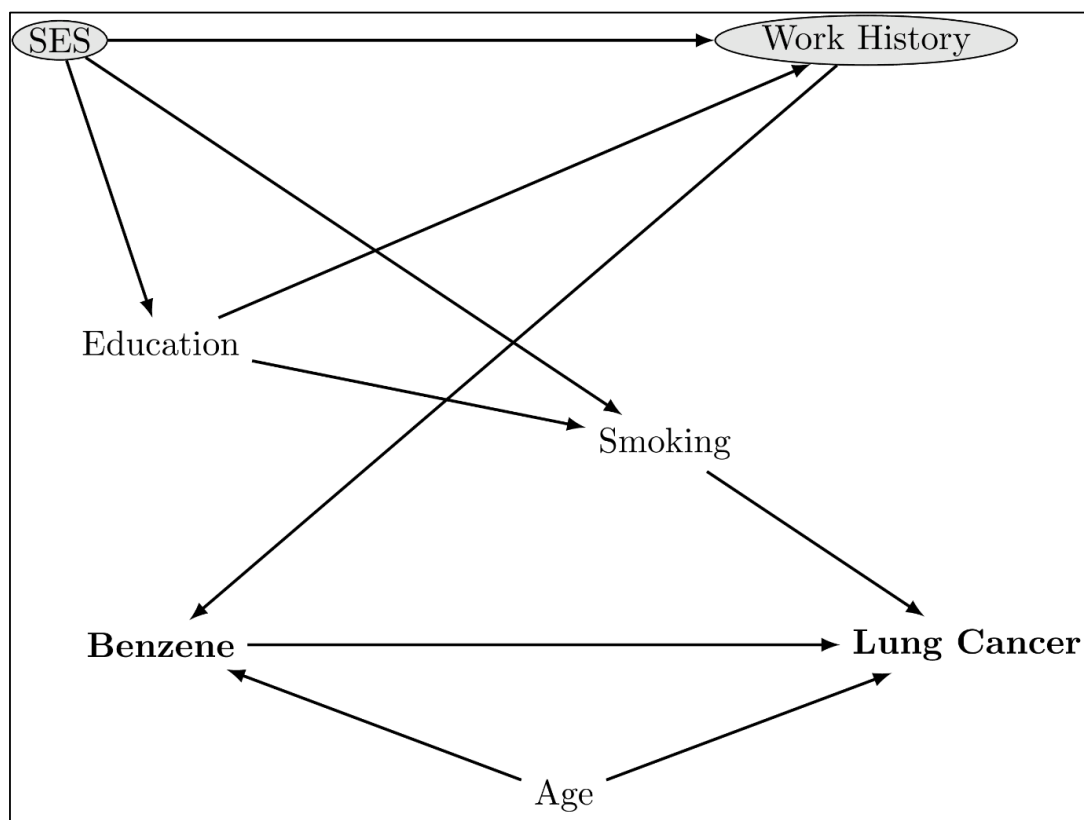

**Figure S2.** Directed acyclic graph showing our assumptions about causal pathways between occupational benzene (exposure of interest, limited to offshore-related activities), other factors, and lung cancer (endpoint). Socio-economic status (SES) and lifetime work history (work history) are unobserved/latent variables. All nodes represent baseline covariate levels. We assumed the following paths:

- benzene → lung cancer
- benzene ← age<sup>1</sup> → lung cancer
- work history → benzene → lung cancer
- SES<sup>2,3</sup> → work history<sup>4</sup> → benzene → lung cancer
- work history ← education<sup>2</sup> → smoking<sup>1,5</sup> → lung cancer
- SES → education → smoking → lung cancer

Based on these assumptions, we need to adjust for smoking and age to obtain the total effect of occupational benzene exposure on lung cancer.

<sup>1</sup>Bade BC, Dela Cruz CS. Lung Cancer 2020: Epidemiology, Etiology, and Prevention. Clinics in Chest Medicine. 2020;41(1):1-24.

<sup>2</sup>Larsen IK, Myklebust TÅ, Babigumira R, Vinberg E, Møller B, Ursin G. Education, income and risk of cancer: results from a Norwegian registry-based study. Acta Oncologica. 2020;59(11):1300-7

<sup>3</sup>Hovanec J, Siemiatycki J, Conway DI, Olsson A, Stücker I, Guida F, et al. Lung cancer and socioeconomic status in a pooled analysis of case-control studies. PLOS ONE. 2018;13(2):e0192999.

<sup>4</sup>Weissman DN, Howard J. Work-Related Lung Cancer: The Practitioner's Perspective. Am J Public Health. 2018;108(10):1290-2.

<sup>5</sup>Wild CP, Weiderpass E, Stewart BW, editors (2020). World Cancer Report: Cancer Research for Cancer Prevention. Lyon, France: International Agency for Research on Cancer. Available from: <http://publications.iarc.fr/586>. Licence: CC BY-NC-ND 3.0 IGO.

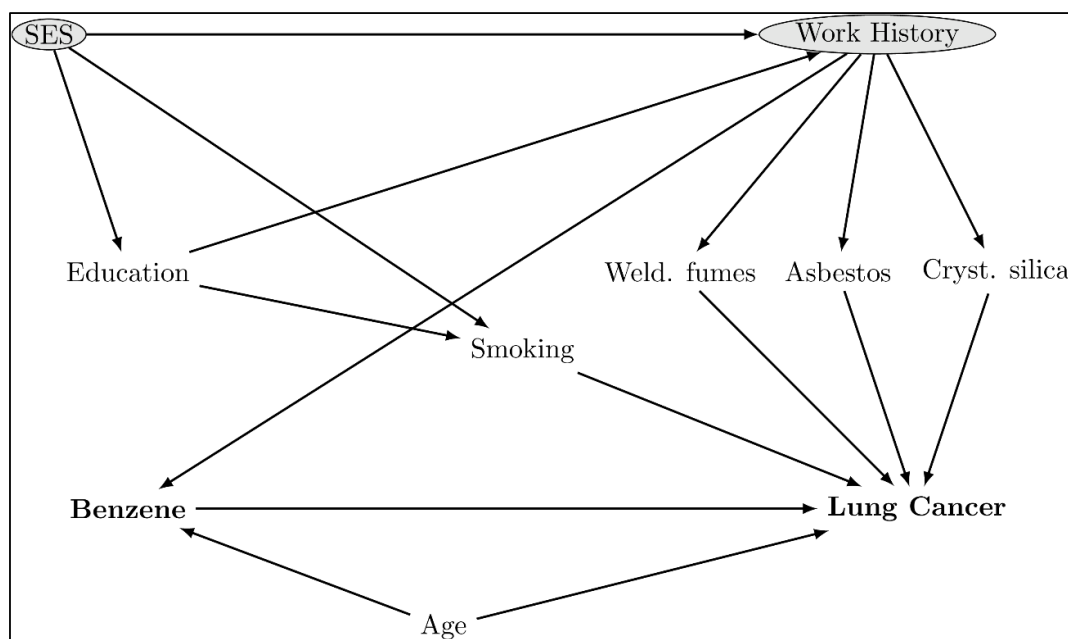

**Figure S3.** Directed acyclic graph showing our assumptions about causal pathways between occupational benzene (exposure of interest, limited to offshore-related activities), other factors and lung cancer (endpoint). Socio-economic status (SES) and lifetime work history (work history) are unobserved/latent variables. All nodes represent baseline covariate levels. We assumed the following paths;

- benzene  $\rightarrow$  lung cancer
- benzene  $\leftarrow$  age<sup>1</sup>  $\rightarrow$  lung cancer
- work history  $\rightarrow$  benzene  $\rightarrow$  lung cancer
- SES<sup>2,3</sup>  $\rightarrow$  work history<sup>4</sup>  $\rightarrow$  benzene  $\rightarrow$  lung cancer
- work history  $\leftarrow$  education<sup>2</sup>  $\rightarrow$  smoking<sup>1,5</sup>  $\rightarrow$  lung cancer
- SES  $\rightarrow$  education  $\rightarrow$  smoking  $\rightarrow$  lung cancer
- work history  $\rightarrow$  welding fumes<sup>6</sup>  $\rightarrow$  lung cancer
- work history  $\rightarrow$  asbestos<sup>5,6</sup>  $\rightarrow$  lung cancer
- work history  $\rightarrow$  crystalline silica<sup>5,6</sup>  $\rightarrow$  lung cancer

Based on these assumptions, we need to adjust for smoking, age, welding fumes, asbestos, and crystalline silica to obtain the total effect of occupational benzene exposure on lung cancer.

<sup>1</sup>Bade BC, Dela Cruz CS. Lung Cancer 2020: Epidemiology, Etiology, and Prevention. Clinics in Chest Medicine. 2020;41(1):1-24.

<sup>2</sup>Larsen IK, Myklebust TÅ, Babigumira R, Vinberg E, Møller B, Ursin G. Education, income and risk of cancer: results from a Norwegian registry-based study. Acta Oncologica. 2020;59(11):1300-7

<sup>3</sup>Hovanec J, Siemiatycki J, Conway DI, Olsson A, Stücker I, Guida F, et al. Lung cancer and socioeconomic status in a pooled analysis of case-control studies. PLOS ONE. 2018;13(2):e0192999.

<sup>4</sup>Weissman DN, Howard J. Work-Related Lung Cancer: The Practitioner's Perspective. Am J Public Health. 2018;108(10):1290-2.

<sup>5</sup>Wild CP, Weiderpass E, Stewart BW, editors (2020). World Cancer Report: Cancer Research for Cancer Prevention. Lyon, France: International Agency for Research on Cancer. Available from: <http://publications.iarc.fr/586>. Licence: CC BY-NC-ND 3.0 IGO.

<sup>6</sup>IARC. List of classifications by cancer sites with sufficient or limited evidence in humans, IARC Monographs Volumes 1–1332023 26.06.2023. Available from: [https://monographs.iarc.who.int/wp-content/uploads/2019/07/Classifications\\_by\\_cancer\\_site.pdf](https://monographs.iarc.who.int/wp-content/uploads/2019/07/Classifications_by_cancer_site.pdf).

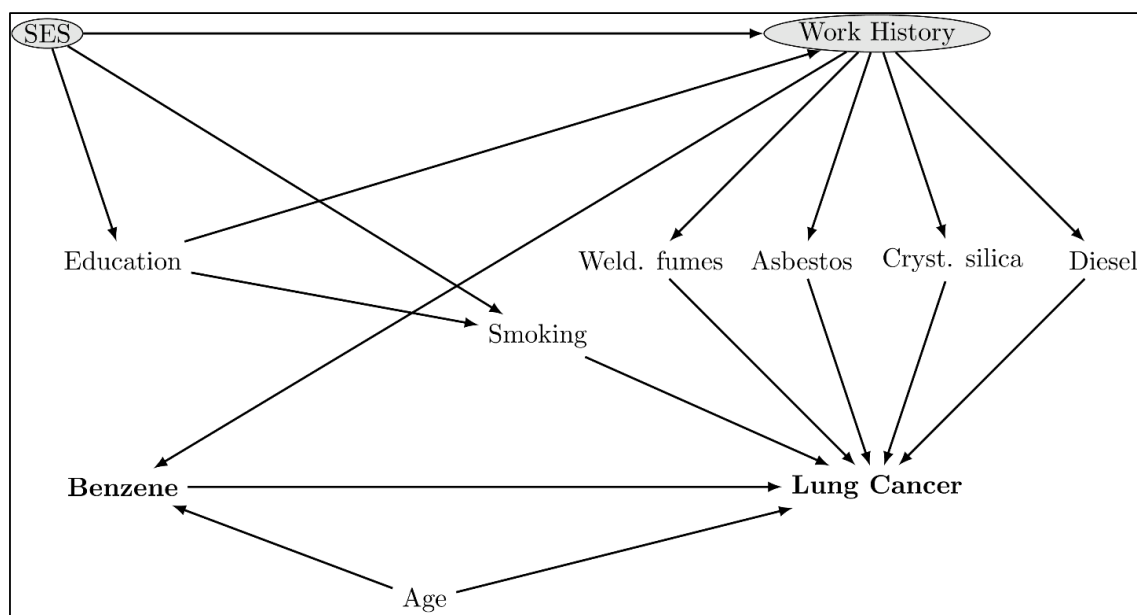

**Figure S4.** Directed acyclic graph showing our assumptions about causal pathways between occupational benzene (exposure of interest, limited to offshore-related activities), other factors and lung cancer (endpoint). Socio-economic status (SES) and lifetime work history (work history) are unobserved/latent variables. All nodes represent baseline covariate levels. We assumed the following paths;

- benzene  $\rightarrow$  lung cancer
- benzene  $\leftarrow$  age<sup>1</sup>  $\rightarrow$  lung cancer
- work history  $\rightarrow$  benzene  $\rightarrow$  lung cancer
- SES<sup>2,3</sup>  $\rightarrow$  work history<sup>4</sup>  $\rightarrow$  benzene  $\rightarrow$  lung cancer
- work history  $\leftarrow$  education<sup>2</sup>  $\rightarrow$  smoking<sup>1,5</sup>  $\rightarrow$  lung cancer
- SES  $\rightarrow$  education  $\rightarrow$  smoking  $\rightarrow$  lung cancer
- work history  $\rightarrow$  welding fumes<sup>6</sup>  $\rightarrow$  lung cancer
- work history  $\rightarrow$  asbestos<sup>5,6</sup>  $\rightarrow$  lung cancer
- work history  $\rightarrow$  crystalline silica<sup>5,6</sup>  $\rightarrow$  lung cancer
- work history  $\rightarrow$  diesel exhaust<sup>5,6</sup>  $\rightarrow$  lung cancer

Based on these assumptions, we need to adjust for smoking, age, welding fumes, asbestos, crystalline silica and diesel exhaust to obtain the total effect of occupational benzene exposure on lung cancer.

<sup>1</sup>Bade BC, Dela Cruz CS. Lung Cancer 2020: Epidemiology, Etiology, and Prevention. Clinics in Chest Medicine. 2020;41(1):1-24.

<sup>2</sup>Larsen IK, Myklebust TÅ, Babigumira R, Vinberg E, Møller B, Ursin G. Education, income and risk of cancer: results from a Norwegian registry-based study. Acta Oncologica. 2020;59(11):1300-7

<sup>3</sup>Hovanec J, Siemiatycki J, Conway DI, Olsson A, Stücker I, Guida F, et al. Lung cancer and socioeconomic status in a pooled analysis of case-control studies. PLOS ONE. 2018;13(2):e0192999.

<sup>4</sup>Weissman DN, Howard J. Work-Related Lung Cancer: The Practitioner's Perspective. Am J Public Health. 2018;108(10):1290-2.

<sup>5</sup>Wild CP, Weiderpass E, Stewart BW, editors (2020). World Cancer Report: Cancer Research for Cancer Prevention. Lyon, France: International Agency for Research on Cancer. Available from: <http://publications.iarc.fr/586>. Licence: CC BY-NC-ND 3.0 IGO.

<sup>6</sup>IARC. List of classifications by cancer sites with sufficient or limited evidence in humans, IARC Monographs Volumes 1–1332023 26.06.2023. Available from: [https://monographs.iarc.who.int/wp-content/uploads/2019/07/Classifications\\_by\\_cancer\\_site.pdf](https://monographs.iarc.who.int/wp-content/uploads/2019/07/Classifications_by_cancer_site.pdf)



### Diesel exhaust exposure as a potential confounder

Table S2, Figure S5, and Table S3 are presented below. Table S2 shows the results of analyses using Model 4, in which diesel exhaust was added to Model 3 as a potential confounder (DAG in Figure S4). Scatter plots and correlation coefficients between diesel exhaust and benzene exposure metrics are presented in Figure S5. Table S3 presents the results of diesel exhaust and lung cancer risk analyses.

| <b>Table S2, Model 4.</b> Hazard ratios (HR) with 95% confidence intervals (CIs) of all lung and the major histological subtypes of lung cancer according to benzene exposure among males in the Norwegian Offshore Petroleum Workers (NOPW) cohort, 1999–2021. |         |                                  |                                        |                                                |                                             |
|-----------------------------------------------------------------------------------------------------------------------------------------------------------------------------------------------------------------------------------------------------------------|---------|----------------------------------|----------------------------------------|------------------------------------------------|---------------------------------------------|
|                                                                                                                                                                                                                                                                 |         | All lung <sup>a</sup><br>(n=399) | Adenocarcinoma <sup>a</sup><br>(n=152) | Squamous cell carcinoma <sup>a</sup><br>(n=88) | Small cell carcinoma <sup>a</sup><br>(n=62) |
| Benzene metric                                                                                                                                                                                                                                                  | C/NC    | HR <sup>b</sup> (95% CI)         | HR <sup>b</sup> (95% CI)               | HR <sup>b</sup> (95% CI)                       | HR <sup>b</sup> (95% CI)                    |
| Cumulative (ppm-years)                                                                                                                                                                                                                                          |         |                                  |                                        |                                                |                                             |
| Unexposed                                                                                                                                                                                                                                                       | 112/655 | 1.00 (reference)                 | 1.00 (reference)                       | 1.00 (reference)                               | 1.00 (reference)                            |
| Q1 (0.000 - <0.019)                                                                                                                                                                                                                                             | 85/332  | 1.65 (0.98, 2.77)                | 1.46 (0.66, 3.23)                      | 1.05 (0.39, 2.83)                              | 1.27 (0.36, 4.42)                           |
| Q2 (0.019 - <0.071)                                                                                                                                                                                                                                             | 72/345  | 1.39 (0.79, 2.44)                | 1.08 (0.45, 2.56)                      | 0.68 (0.23, 1.99)                              | 1.29 (0.36, 4.62)                           |
| Q3 (0.071 - <0.175)                                                                                                                                                                                                                                             | 63/354  | 1.28 (0.69, 2.40)                | 2.49 (1.04, 5.95)                      | 0.17 (0.04, 0.66)                              | 0.99 (0.22, 4.45)                           |
| Q4 (0.176-0.879)                                                                                                                                                                                                                                                | 67/349  | 1.27 (0.67, 2.38)                | 1.46 (0.56, 3.80)                      | 0.39 (0.10, 1.56)                              | 1.31 (0.35, 4.90)                           |
| <i>P-Trend</i>                                                                                                                                                                                                                                                  |         | 0.693                            | 0.904                                  | 0.299                                          | 0.726                                       |
| Duration (years)                                                                                                                                                                                                                                                |         |                                  |                                        |                                                |                                             |
| Unexposed                                                                                                                                                                                                                                                       | 112/655 | 1.00 (reference)                 | 1.00 (reference)                       | 1.00 (reference)                               | 1.00 (reference)                            |
| Q1 (1 - 4)                                                                                                                                                                                                                                                      | 69/382  | 1.24 (0.71, 2.17)                | 0.99 (0.44, 2.24)                      | 0.62 (0.19, 1.98)                              | 1.35 (0.37, 4.97)                           |
| Q2 (5 - 10)                                                                                                                                                                                                                                                     | 85/366  | 1.67 (0.98, 2.87)                | 1.50 (0.64, 3.50)                      | 1.11 (0.41, 3.02)                              | 1.17 (0.34, 4.08)                           |
| Q3 (11 - 16)                                                                                                                                                                                                                                                    | 64/301  | 1.73 (0.98, 3.05)                | 2.12 (0.88, 5.09)                      | 0.85 (0.29, 2.47)                              | 1.32 (0.35, 4.96)                           |
| Q4 (17 - 34)                                                                                                                                                                                                                                                    | 69/331  | 1.57 (0.83, 2.97)                | 2.28 (0.88, 5.90)                      | 1.01 (0.26, 3.91)                              | 1.50 (0.36, 6.26)                           |
| <i>P-Trend</i>                                                                                                                                                                                                                                                  |         | 0.202                            | 0.026                                  | 0.818                                          | 0.653                                       |
| Average intensity (ppm)                                                                                                                                                                                                                                         |         |                                  |                                        |                                                |                                             |
| Unexposed                                                                                                                                                                                                                                                       | 112/655 | 1.00 (reference)                 | 1.00 (reference)                       | 1.00 (reference)                               | 1.00 (reference)                            |
| Q1 (0.000 - <0.004)                                                                                                                                                                                                                                             | 90/327  | 1.57 (0.95, 2.59)                | 1.36 (0.63, 2.94)                      | 1.00 (0.39, 2.56)                              | 1.36 (0.43, 4.37)                           |
| Q2 (0.004 - <0.007)                                                                                                                                                                                                                                             | 66/351  | 1.66 (0.90, 3.06)                | 2.22 (0.92, 5.35)                      | 0.69 (0.21, 2.23)                              | 1.92 (0.46, 7.94)                           |
| Q3 (0.007 - <0.014)                                                                                                                                                                                                                                             | 73/344  | 1.67 (0.90, 3.10)                | 2.15 (0.87, 5.28)                      | 0.70 (0.22, 2.22)                              | 2.22 (0.58, 8.47)                           |
| Q4 (0.014 - 0.046)                                                                                                                                                                                                                                              | 58/358  | 1.30 (0.72, 2.34)                | 1.43 (0.57, 3.57)                      | 0.47 (0.15, 1.47)                              | 0.87 (0.22, 3.38)                           |
| <i>P-Trend</i>                                                                                                                                                                                                                                                  |         | 0.648                            | 0.988                                  | 0.103                                          | 0.385                                       |
| Abbreviations: C=cases, NC= non cases, Q=quartile                                                                                                                                                                                                               |         |                                  |                                        |                                                |                                             |
| <sup>a</sup> Adjusted for age (as the time scale), smoking, welding fumes, asbestos, crystalline silica, and diesel exhaust                                                                                                                                     |         |                                  |                                        |                                                |                                             |
| <sup>b</sup> Missing values were imputed                                                                                                                                                                                                                        |         |                                  |                                        |                                                |                                             |

*Cumulative exposure*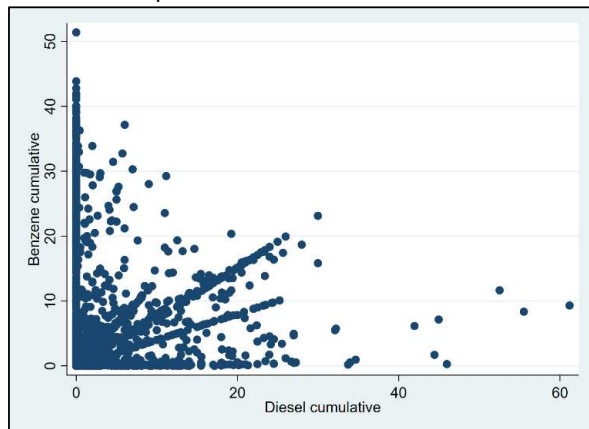

Spearman correlation coefficient=0.41

*Duration*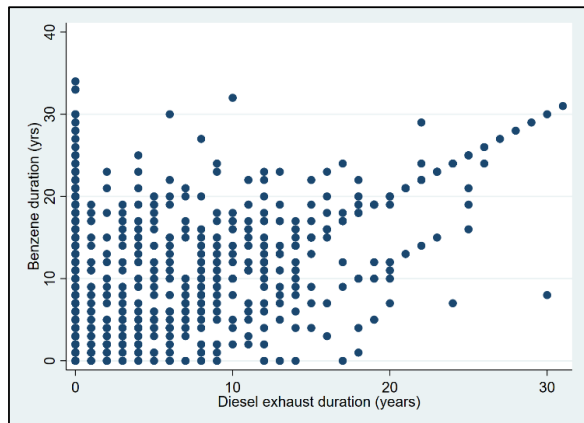

Spearman correlation coefficient=0.51

*Average intensity*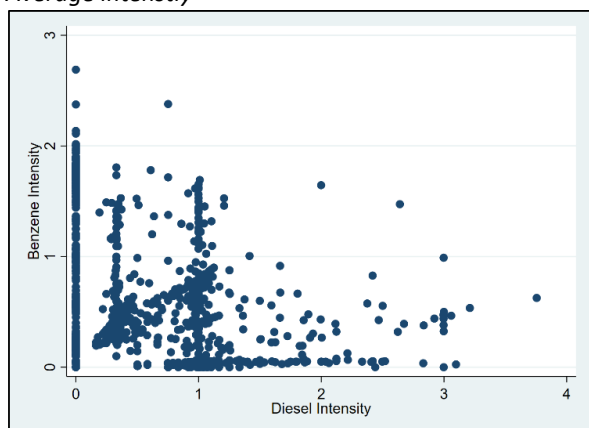

Spearman correlation coefficient=0.33

**Figure S5.** Correlation between benzene and diesel exhaust metrics

### Examination of the association between diesel exhaust exposure and lung cancer risk

**Table S3.** Hazard ratios (HR) with 95% confidence intervals (CIs) of lung cancer according to diesel exhaust exposure among males in the Norwegian Offshore Petroleum Workers cohort, 1999–2021.

|                                                                |                 | Model D1 <sup>a</sup>                 | Model D2 <sup>b</sup>    |
|----------------------------------------------------------------|-----------------|---------------------------------------|--------------------------|
| Diesel exhaust metric                                          | Cases/Non-cases | HR <sup>c</sup> (95% CI) <sup>c</sup> | HR <sup>c</sup> (95% CI) |
| <b>Cumulative</b>                                              |                 |                                       |                          |
| Unexposed                                                      | 219/1098        | 1.00 (reference)                      | 1.00 (reference)         |
| Q1 (0.165 - <1.895)                                            | 41/239          | 0.86 (0.60, 1.23)                     | 0.96 (0.65, 1.41)        |
| Q2 (1.977 - <4.579)                                            | 38/241          | 0.85 (0.59, 1.24)                     | 0.88 (0.59, 1.30)        |
| Q3 (4.614 - <10.489)                                           | 51/228          | 1.14 (0.82, 1.60)                     | 0.99 (0.69, 1.42)        |
| Q4 (10.493 - 61.181)                                           | 50/229          | 1.00 (0.72, 1.40)                     | 0.89 (0.62, 1.26)        |
| <i>P-trend</i>                                                 |                 | 0.722                                 | 0.422                    |
| <b>Duration (years)</b>                                        |                 |                                       |                          |
| Unexposed                                                      | 219/1098        | 1.00 (reference)                      | 1.00 (reference)         |
| Q1 (1 - 3)                                                     | 48/262          | 0.91 (0.64, 1.27)                     | 0.98 (0.68, 1.42)        |
| Q2 (4 - 7)                                                     | 46/218          | 1.09 (0.77, 1.55)                     | 0.99 (0.68, 1.43)        |
| Q3 (8 - 13)                                                    | 41/226          | 0.91 (0.63, 1.31)                     | 0.86 (0.58, 1.26)        |
| Q4 (14 - 31)                                                   | 45/231          | 0.97 (0.68, 1.37)                     | 0.89 (0.62, 1.29)        |
| <i>P-trend</i>                                                 |                 | 0.842                                 | 0.427                    |
| <b>Average intensity</b>                                       |                 |                                       |                          |
| Unexposed                                                      | 219/1098        | 1.00 (reference)                      | 1.00 (reference)         |
| Q1 (0.165 - <0.332)                                            | 39/241          | 0.85 (0.59, 1.23)                     | 0.94 (0.63, 1.41)        |
| Q2 (0.332 - <0.940)                                            | 44/235          | 0.95 (0.67, 1.35)                     | 0.98 (0.68, 1.42)        |
| Q3 (0.941 - <1.000)                                            | 56/223          | 1.25 (0.90, 1.73)                     | 1.11 (0.78, 1.57)        |
| Q4 (1.000 - 4.004)                                             | 41/238          | 0.83 (0.58, 1.18)                     | 0.72 (0.49, 1.05)        |
| <i>P-trend</i>                                                 |                 | 0.932                                 | 0.416                    |
| Abbreviations: D=diesel exhaust; Q=quartile                    |                 |                                       |                          |
| <sup>a</sup> Adjusted for age (as the time scale).             |                 |                                       |                          |
| <sup>b</sup> Adjusted for age (as the time scale) and smoking. |                 |                                       |                          |
| <sup>c</sup> Missing values in smoking were imputed.           |                 |                                       |                          |

#### Evaluation of diesel exhaust as a potential confounder of the benzene–lung cancer association

In Table S2 with Model 4, we found that HRs consistently increased by 10% compared to Model 3. This increase is likely due to negative bias or negative confounding (Szklo and Janiver-Nieto, 2000) since we (A) observed positive correlations between diesel exhaust and benzene metrics, and (B) in Table S3, Model D2, observed a null or negative association between diesel exhaust and lung cancer. The lack of an association between diesel exhaust and lung cancer in our data may be due to low concentrations in the offshore working environment. Concentrations have been reported by the Norwegian Institute of Occupational Health to be low (Solbu et al., 2012).

#### References

- Solbu K, Bakke B, Friisk G, Skaugset NP. Dieseleksos i arbeidsatmosfæren i norsk olje- og gassindustri – Dagens eksponeringsbilde. Report in Norwegian. Oslo, Norway: STAMI. No 4 (13), 2012. URL: <https://stami.no/content/uploads/2015/03/STAMI-rapport-nr-4-2012.pdf>
- Szklo M, Javier-Nieto F. Identifying non causal associations: Confounding. In: Epidemiology: Beyond the Basics. Gaithersburg, MD: Aspen Publishers, Inc.; 2000:203.

**Analysis stratified by year of first employment.****Before 1980**

| <b>Table S4a.</b> Hazard ratios (HR) with 95% confidence intervals (CIs) of lung cancer according to benzene exposure among males in the Norwegian Offshore Petroleum Workers cohort whose first employment was before 1980, 1999–2021. |                        |                                |                                |                                |
|-----------------------------------------------------------------------------------------------------------------------------------------------------------------------------------------------------------------------------------------|------------------------|--------------------------------|--------------------------------|--------------------------------|
|                                                                                                                                                                                                                                         |                        | <b>Model 1<sup>a</sup></b>     | <b>Model 2<sup>b</sup></b>     | <b>Model 3<sup>c</sup></b>     |
| <b>Benzene metric</b>                                                                                                                                                                                                                   | <b>Cases/Non-cases</b> | <b>HR<sup>d</sup> (95% CI)</b> | <b>HR<sup>d</sup> (95% CI)</b> | <b>HR<sup>d</sup> (95% CI)</b> |
| Cumulative (ppm-years)                                                                                                                                                                                                                  |                        |                                |                                |                                |
| Unexposed                                                                                                                                                                                                                               | 54/317                 | 1.00 (reference)               | 1.00 (reference)               | 1.00 (reference)               |
| Q1 (0.000 - <0.025)                                                                                                                                                                                                                     | 43/182                 | 1.22 (0.79, 1.88)              | 1.19 (0.75, 1.89)              | 1.39 (0.66, 2.91)              |
| Q2 (0.025 - <0.091)                                                                                                                                                                                                                     | 36/189                 | 1.28 (0.81, 2.00)              | 1.35 (0.84, 2.17)              | 1.62 (0.74, 3.55)              |
| Q3 (0.092 - <0.198)                                                                                                                                                                                                                     | 36/189                 | 1.06 (0.67, 1.66)              | 1.12 (0.70, 1.80)              | 1.49 (0.68, 3.29)              |
| Q4 (0.199 - 0.879)                                                                                                                                                                                                                      | 38/186                 | 1.20 (0.77, 1.87)              | 1.12 (0.71, 1.78)              | 1.50 (0.64, 3.52)              |
| <i>P-Trend</i>                                                                                                                                                                                                                          |                        | 0.705                          | 0.925                          | 0.823                          |
| Duration (years)                                                                                                                                                                                                                        |                        |                                |                                |                                |
| Unexposed                                                                                                                                                                                                                               | 54/317                 | 1.00 (reference)               | 1.00 (reference)               | 1.00 (reference)               |
| Q1 (1 - 5)                                                                                                                                                                                                                              | 36/206                 | 0.98 (0.63, 1.54)              | 1.02 (0.63, 1.65)              | 1.10 (0.48, 2.51)              |
| Q2 (6 - 12)                                                                                                                                                                                                                             | 39/181                 | 1.43 (0.91, 2.24)              | 1.54 (0.97, 2.46)              | 1.69 (0.81, 3.55)              |
| Q3 (13 - 20)                                                                                                                                                                                                                            | 46/212                 | 1.25 (0.82, 1.91)              | 1.19 (0.77, 1.85)              | 1.54 (0.73, 3.26)              |
| Q4 (21 - 34)                                                                                                                                                                                                                            | 32/147                 | 1.12 (0.70, 1.78)              | 1.08 (0.66, 1.77)              | 1.55 (0.63, 3.79)              |
| <i>P-Trend</i>                                                                                                                                                                                                                          |                        | 0.301                          | 0.510                          | 0.224                          |
| Average intensity (ppm)                                                                                                                                                                                                                 |                        |                                |                                |                                |
| Unexposed                                                                                                                                                                                                                               | 54/317                 | 1.00 (reference)               | 1.00 (reference)               | 1.00 (reference)               |
| Q1 (0.000 - <0.004)                                                                                                                                                                                                                     | 45/180                 | 1.23 (0.80, 1.89)              | 1.12 (0.71, 1.77)              | 1.36 (0.66, 2.79)              |
| Q2 (0.004 - <0.008)                                                                                                                                                                                                                     | 37/189                 | 1.18 (0.76, 1.85)              | 1.31 (0.82, 2.10)              | 1.70 (0.78, 3.71)              |
| Q3 (0.008 - <0.013)                                                                                                                                                                                                                     | 40/184                 | 1.28 (0.83, 1.97)              | 1.26 (0.80, 1.98)              | 1.73 (0.77, 3.88)              |
| Q4 (0.013 - 0.046)                                                                                                                                                                                                                      | 31/193                 | 1.03 (0.65, 1.65)              | 1.08 (0.67, 1.76)              | 1.35 (0.58, 3.14)              |
| <i>P-Trend</i>                                                                                                                                                                                                                          |                        | 0.943                          | 0.760                          | 0.992                          |
| Abbreviations: Q=quartile                                                                                                                                                                                                               |                        |                                |                                |                                |
| <sup>a</sup> Adjusted for age (as the time scale).                                                                                                                                                                                      |                        |                                |                                |                                |
| <sup>b</sup> Adjusted for age (as the time scale) and smoking.                                                                                                                                                                          |                        |                                |                                |                                |
| <sup>c</sup> Adjusted for age (as the time scale), smoking, welding fumes, asbestos and crystalline silica.                                                                                                                             |                        |                                |                                |                                |
| <sup>d</sup> Missing values in covariates were imputed.                                                                                                                                                                                 |                        |                                |                                |                                |

## After or in 1980

| <b>Table S4b.</b> Hazard ratios (HR) with 95% confidence intervals (CIs) of lung cancer according to benzene exposure among males in the Norwegian Offshore Petroleum Workers cohort whose first employment was after 1980, 1999–2021. |                        |                                |                                |                                |
|----------------------------------------------------------------------------------------------------------------------------------------------------------------------------------------------------------------------------------------|------------------------|--------------------------------|--------------------------------|--------------------------------|
|                                                                                                                                                                                                                                        |                        | <b>Model 1<sup>a</sup></b>     | <b>Model 2<sup>b</sup></b>     | <b>Model 3<sup>c</sup></b>     |
| <b>Benzene metric</b>                                                                                                                                                                                                                  | <b>Cases/Non-cases</b> | <b>HR<sup>d</sup> (95% CI)</b> | <b>HR<sup>d</sup> (95% CI)</b> | <b>HR<sup>d</sup> (95% CI)</b> |
| Cumulative (ppm-years)                                                                                                                                                                                                                 |                        |                                |                                |                                |
| Unexposed                                                                                                                                                                                                                              | 58/338                 | 1.00 (reference)               | 1.00 (reference)               | 1.00 (reference)               |
| Q1 (0.000 - <0.016)                                                                                                                                                                                                                    | 42/150                 | 1.48 (0.95, 2.29)              | 1.50 (0.93, 2.42)              | 1.93 (0.97, 3.85)              |
| Q2 (0.017 - <0.053)                                                                                                                                                                                                                    | 38/154                 | 1.39 (0.89, 2.19)              | 1.34 (0.83, 2.17)              | 1.76 (0.84, 3.67)              |
| Q3 (0.053 - <0.128)                                                                                                                                                                                                                    | 25/167                 | 0.97 (0.58, 1.61)              | 0.98 (0.57, 1.69)              | 0.94 (0.40, 2.23)              |
| Q4 (0.129 - 0.555)                                                                                                                                                                                                                     | 29/163                 | 1.04 (0.64, 1.70)              | 1.03 (0.61, 1.73)              | 0.71 (0.28, 1.83)              |
| <i>P-Trend</i>                                                                                                                                                                                                                         |                        | 0.571                          | 0.565                          | 0.070                          |
| Duration (years)                                                                                                                                                                                                                       |                        |                                |                                |                                |
| Unexposed                                                                                                                                                                                                                              | 58/338                 | 1.00 (reference)               | 1.00 (reference)               | 1.00 (reference)               |
| Q1 (1 - 3)                                                                                                                                                                                                                             | 33/163                 | 1.09 (0.68, 1.74)              | 1.18 (0.71, 1.95)              | 1.78 (0.83, 3.83)              |
| Q2 (4 - 7)                                                                                                                                                                                                                             | 39/151                 | 1.52 (0.97, 2.39)              | 1.33 (0.82, 2.15)              | 1.88 (0.91, 3.88)              |
| Q3 (8 - 12)                                                                                                                                                                                                                            | 36/156                 | 1.33 (0.84, 2.11)              | 1.29 (0.79, 2.12)              | 1.40 (0.66, 3.01)              |
| Q4 (13 - 19)                                                                                                                                                                                                                           | 26/164                 | 0.99 (0.60, 1.63)              | 1.06 (0.62, 1.80)              | 0.90 (0.37, 2.17)              |
| <i>P-Trend</i>                                                                                                                                                                                                                         |                        | 0.612                          | 0.613                          | 0.648                          |
| Average intensity (ppm)                                                                                                                                                                                                                |                        |                                |                                |                                |
| Unexposed                                                                                                                                                                                                                              | 58/338                 | 1.00 (reference)               | 1.00 (reference)               | 1.00 (reference)               |
| Q1 (0.000 - <0.004)                                                                                                                                                                                                                    | 45/147                 | 1.66 (1.07, 2.56)              | 1.63 (1.02, 2.61)              | 1.84 (0.95, 3.56)              |
| Q2 (0.004 - <0.007)                                                                                                                                                                                                                    | 32/160                 | 1.22 (0.76, 1.95)              | 1.30 (0.78, 2.16)              | 1.51 (0.67, 3.36)              |
| Q3 (0.007 - <0.015)                                                                                                                                                                                                                    | 31/161                 | 1.13 (0.70, 1.82)              | 0.94 (0.56, 1.57)              | 1.01 (0.42, 2.42)              |
| Q4 (0.015 - 0.041)                                                                                                                                                                                                                     | 26/166                 | 0.91 (0.55, 1.51)              | 1.05 (0.62, 1.78)              | 0.99 (0.42, 2.32)              |
| <i>P-Trend</i>                                                                                                                                                                                                                         |                        | 0.322                          | 0.645                          | 0.308                          |
| Abbreviations: Q=quartile                                                                                                                                                                                                              |                        |                                |                                |                                |
| <sup>a</sup> Adjusted for age (as the time scale).                                                                                                                                                                                     |                        |                                |                                |                                |
| <sup>b</sup> Adjusted for age (as the time scale) and smoking.                                                                                                                                                                         |                        |                                |                                |                                |
| <sup>c</sup> Adjusted for age (as the time scale), smoking, welding fumes, asbestos and crystalline silica.                                                                                                                            |                        |                                |                                |                                |
| <sup>d</sup> Missing values in covariates were imputed.                                                                                                                                                                                |                        |                                |                                |                                |

## Latency analyses with time-varying benzene exposure

## Lagged analysis

| <b>Table S5a.</b> Hazard Ratios (HR) of lung cancer according to lagged benzene exposure among males in the Norwegian Offshore Petroleum Workers (NOPW) cohort, 1999–2021. |              |                     |                                |                                |                                |
|----------------------------------------------------------------------------------------------------------------------------------------------------------------------------|--------------|---------------------|--------------------------------|--------------------------------|--------------------------------|
| <b>Benzene metric</b>                                                                                                                                                      | <b>Cases</b> | <b>Person years</b> | <b>Model 1<sup>a</sup></b>     | <b>Model 2<sup>b</sup></b>     | <b>Model 3<sup>c</sup></b>     |
|                                                                                                                                                                            |              |                     | <b>HR<sup>d</sup> (95% CI)</b> | <b>HR<sup>d</sup> (95% CI)</b> | <b>HR<sup>d</sup> (95% CI)</b> |
| <b>Cumulative (ppm-years)</b>                                                                                                                                              |              |                     |                                |                                |                                |
| <b>10-year lag</b>                                                                                                                                                         |              |                     |                                |                                |                                |
| Unexposed                                                                                                                                                                  | 117          | 13876               | 1.00 (reference)               | 1.00 (reference)               | 1.00 (reference)               |
| Q1 (0.000 - <0.017)                                                                                                                                                        | 81           | 6802                | 1.36 (1.00, 1.86)              | 1.33 (0.95, 1.85)              | 1.38 (0.86, 2.22)              |
| Q2 (0.017 - <0.065)                                                                                                                                                        | 70           | 6768                | 1.26 (0.91, 1.74)              | 1.28 (0.91, 1.80)              | 1.26 (0.74, 2.14)              |
| Q3 (0.065 - <0.157)                                                                                                                                                        | 65           | 6784                | 1.13 (0.82, 1.57)              | 1.11 (0.78, 1.56)              | 1.09 (0.61, 1.96)              |
| Q4 (0.157 - 0.879)                                                                                                                                                         | 66           | 6831                | 1.07 (0.77, 1.48)              | 1.05 (0.75, 1.47)              | 0.93 (0.50, 1.71)              |
| <i>P-trend</i>                                                                                                                                                             |              |                     | 0.719                          | 0.668                          | 0.212                          |
| <b>15-year lag</b>                                                                                                                                                         |              |                     |                                |                                |                                |
| Unexposed                                                                                                                                                                  | 126          | 15259               | 1.00 (reference)               | 1.00 (reference)               | 1.00 (reference)               |
| Q1 (0.000 - <0.015)                                                                                                                                                        | 78           | 6456                | 1.33 (0.98, 1.82)              | 1.29 (0.93, 1.79)              | 1.22 (0.78, 1.91)              |
| Q2 (0.015 - <0.057)                                                                                                                                                        | 66           | 6399                | 1.21 (0.88, 1.67)              | 1.26 (0.90, 1.77)              | 1.13 (0.68, 1.88)              |
| Q3 (0.057 - <0.137)                                                                                                                                                        | 61           | 6450                | 1.04 (0.75, 1.45)              | 1.03 (0.73, 1.44)              | 0.84 (0.48, 1.47)              |
| Q4 (0.137 - 0.879)                                                                                                                                                         | 68           | 6497                | 1.01 (0.74, 1.39)              | 0.99 (0.71, 1.38)              | 0.77 (0.43, 1.39)              |
| <i>P-trend</i>                                                                                                                                                             |              |                     | 0.509                          | 0.461                          | 0.121                          |
| <b>20-year lag</b>                                                                                                                                                         |              |                     |                                |                                |                                |
| Unexposed                                                                                                                                                                  | 141          | 18146               | 1.00 (reference)               | 1.00 (reference)               | 1.00 (reference)               |
| Q1 (0.000 - <0.012)                                                                                                                                                        | 79           | 5695                | 1.51 (1.11, 2.04)              | 1.48 (1.07, 2.04)              | 1.38 (0.92, 2.05)              |
| Q2 (0.012 - <0.044)                                                                                                                                                        | 50           | 5711                | 0.94 (0.67, 1.33)              | 0.95 (0.67, 1.36)              | 0.81 (0.51, 1.30)              |
| Q3 (0.044 - <0.111)                                                                                                                                                        | 60           | 5725                | 1.08 (0.78, 1.50)              | 1.09 (0.78, 1.52)              | 0.87 (0.53, 1.43)              |
| Q4 (0.111 - 0.879)                                                                                                                                                         | 69           | 5783                | 1.02 (0.75, 1.39)              | 1.00 (0.72, 1.38)              | 0.80 (0.47, 1.34)              |
| <i>P-trend</i>                                                                                                                                                             |              |                     | 0.589                          | 0.532                          | 0.207                          |
| <b>Duration (years)</b>                                                                                                                                                    |              |                     |                                |                                |                                |
| <b>10-year lag</b>                                                                                                                                                         |              |                     |                                |                                |                                |
| Unexposed                                                                                                                                                                  | 117          | 13876               | 1.00 (reference)               | 1.00 (reference)               | 1.00 (reference)               |
| Q1 (1 - <4)                                                                                                                                                                | 63           | 7596                | 0.95 (0.68, 1.32)              | 0.96 (0.68, 1.37)              | 1.05 (0.63, 1.76)              |
| Q2 (5 - <9)                                                                                                                                                                | 79           | 6531                | 1.52 (1.11, 2.09)              | 1.50 (1.08, 2.09)              | 1.66 (0.99, 2.77)              |
| Q3 (10 - <15)                                                                                                                                                              | 68           | 6994                | 1.15 (0.83, 1.59)              | 1.16 (0.83, 1.63)              | 1.32 (0.78, 2.23)              |
| Q4 (16 - 34)                                                                                                                                                               | 72           | 6064                | 1.28 (0.93, 1.76)              | 1.19 (0.85, 1.66)              | 1.25 (0.68, 2.30)              |
| <i>P-trend</i>                                                                                                                                                             |              |                     | 0.068                          | 0.194                          | 0.574                          |
| <b>15-year lag</b>                                                                                                                                                         |              |                     |                                |                                |                                |
| Unexposed                                                                                                                                                                  | 126          | 15259               | 1.00 (reference)               | 1.00 (reference)               | 1.00 (reference)               |
| Q1 (1 - <4)                                                                                                                                                                | 68           | 8025                | 0.96 (0.70, 1.32)              | 0.98 (0.70, 1.37)              | 1.00 (0.62, 1.61)              |
| Q2 (5 - <8)                                                                                                                                                                | 72           | 5878                | 1.53 (1.12, 2.10)              | 1.49 (1.07, 2.07)              | 1.47 (0.90, 2.42)              |
| Q3 (9 - <13)                                                                                                                                                               | 55           | 6045                | 1.03 (0.73, 1.44)              | 1.03 (0.72, 1.46)              | 0.98 (0.58, 1.67)              |
| Q4 (14 - 34)                                                                                                                                                               | 78           | 5854                | 1.17 (0.86, 1.59)              | 1.13 (0.82, 1.56)              | 1.03 (0.58, 1.81)              |
| <i>P-trend</i>                                                                                                                                                             |              |                     | 0.237                          | 0.378                          | 0.953                          |
| <b>20-year lag</b>                                                                                                                                                         |              |                     |                                |                                |                                |
| Unexposed                                                                                                                                                                  | 141          | 18146               | 1.00 (reference)               | 1.00 (reference)               | 1.00 (reference)               |
| Q1 (1 - <3)                                                                                                                                                                | 62           | 6787                | 1.05 (0.76, 1.44)              | 1.08 (0.77, 1.51)              | 1.08 (0.70, 1.66)              |
| Q2 (4 - <6)                                                                                                                                                                | 50           | 5032                | 1.16 (0.82, 1.63)              | 1.16 (0.81, 1.66)              | 1.12 (0.71, 1.76)              |
| Q3 (7 - <11)                                                                                                                                                               | 67           | 5830                | 1.18 (0.86, 1.62)              | 1.15 (0.83, 1.59)              | 1.05 (0.66, 1.65)              |
| Q4 (12 - 34)                                                                                                                                                               | 79           | 5265                | 1.16 (0.85, 1.56)              | 1.12 (0.82, 1.53)              | 0.98 (0.59, 1.62)              |
| <i>P-trend</i>                                                                                                                                                             |              |                     | 0.271                          | 0.441                          | 0.803                          |
| Abbreviations: Q=quartile                                                                                                                                                  |              |                     |                                |                                |                                |
| <sup>a</sup> Adjusted for age (as the time scale).                                                                                                                         |              |                     |                                |                                |                                |
| <sup>b</sup> Adjusted for age (as the time scale) and smoking.                                                                                                             |              |                     |                                |                                |                                |
| <sup>c</sup> Adjusted for age (as the time scale), smoking, welding fumes, asbestos and crystalline silica                                                                 |              |                     |                                |                                |                                |
| <sup>d</sup> Missing values were imputed                                                                                                                                   |              |                     |                                |                                |                                |

## Lagged analysis by histological subtype

| <b>Table S5b.</b> Hazard Ratios (HR) of major histological subtypes according to lagged benzene exposure among males in the Norwegian Offshore Petroleum Workers (NOPW) cohort, 1999–2021. |                             |       |                          |                                      |       |                          |                                   |       |                          |
|--------------------------------------------------------------------------------------------------------------------------------------------------------------------------------------------|-----------------------------|-------|--------------------------|--------------------------------------|-------|--------------------------|-----------------------------------|-------|--------------------------|
| Benzene metric                                                                                                                                                                             | Adenocarcinoma <sup>a</sup> |       |                          | Squamous cell carcinoma <sup>a</sup> |       |                          | Small cell carcinoma <sup>a</sup> |       |                          |
|                                                                                                                                                                                            | C                           | PYs   | HR <sup>b</sup> (95% CI) | C                                    | PYs   | HR <sup>b</sup> (95% CI) | C                                 | PYs   | HR <sup>b</sup> (95% CI) |
| <b>Cumulative (ppm-years)</b>                                                                                                                                                              |                             |       |                          |                                      |       |                          |                                   |       |                          |
| 10-year lag                                                                                                                                                                                |                             |       |                          |                                      |       |                          |                                   |       |                          |
| Unexposed                                                                                                                                                                                  | 48                          | 13010 | 1.00 (reference)         | 28                                   | 12882 | 1.00 (reference)         | 15                                | 12739 | 1.00 (reference)         |
| Q1 (0.000 - <0.018)                                                                                                                                                                        | 28                          | 6361  | 1.09 (0.53, 2.24)        | 18                                   | 6211  | 0.96 (0.38, 2.45)        | 13                                | 6199  | 1.01 (0.33, 3.10)        |
| Q2 (0.018 - <0.067)                                                                                                                                                                        | 21                          | 6328  | 1.00 (0.45, 2.24)        | 21                                   | 6191  | 0.77 (0.28, 2.10)        | 12                                | 6169  | 0.94 (0.29, 3.08)        |
| Q3 (0.067 - <0.159)                                                                                                                                                                        | 33                          | 6354  | 1.69 (0.75, 3.80)        | 5                                    | 6203  | 0.18 (0.05, 0.68)        | 10                                | 6193  | 0.62 (0.16, 2.46)        |
| Q4 (0.159 - 0.879)                                                                                                                                                                         | 22                          | 6387  | 0.98 (0.38, 2.52)        | 16                                   | 6232  | 0.36 (0.09, 1.38)        | 12                                | 6215  | 0.99 (0.28, 3.57)        |
| <i>P-trend</i>                                                                                                                                                                             |                             |       | 0.621                    |                                      |       | 0.205                    |                                   |       | 0.730                    |
| 15-year lag                                                                                                                                                                                |                             |       |                          |                                      |       |                          |                                   |       |                          |
| Unexposed                                                                                                                                                                                  | 50                          | 14258 | 1.00 (reference)         | 30                                   | 14095 | 1.00 (reference)         | 17                                | 13944 | 1.00 (reference)         |
| Q1 (0.000 - <0.016)                                                                                                                                                                        | 28                          | 6052  | 1.13 (0.58, 2.23)        | 17                                   | 5919  | 0.89 (0.37, 2.14)        | 11                                | 5889  | 0.76 (0.26, 2.23)        |
| Q2 (0.016 - <0.058)                                                                                                                                                                        | 19                          | 5996  | 0.95 (0.43, 2.10)        | 19                                   | 5857  | 0.72 (0.27, 1.94)        | 10                                | 5854  | 0.77 (0.25, 2.36)        |
| Q3 (0.058 - <0.138)                                                                                                                                                                        | 33                          | 6037  | 1.52 (0.69, 3.31)        | 6                                    | 5894  | 0.19 (0.05, 0.76)        | 11                                | 5889  | 0.67 (0.19, 2.32)        |
| Q4 (0.138 - 0.879)                                                                                                                                                                         | 22                          | 6097  | 0.88 (0.36, 2.18)        | 16                                   | 5955  | 0.35 (0.10, 1.30)        | 13                                | 5938  | 0.95 (0.30, 2.99)        |
| <i>P-trend</i>                                                                                                                                                                             |                             |       | 0.445                    |                                      |       | 0.183                    |                                   |       | 0.582                    |
| 20-year lag                                                                                                                                                                                |                             |       |                          |                                      |       |                          |                                   |       |                          |
| Unexposed                                                                                                                                                                                  | 56                          | 16903 | 1.00 (reference)         | 32                                   | 16671 | 1.00 (reference)         | 18                                | 16514 | 1.00 (reference)         |
| Q1 (0.000 - <0.013)                                                                                                                                                                        | 28                          | 5351  | 1.25 (0.67, 2.33)        | 16                                   | 5241  | 1.08 (0.49, 2.36)        | 11                                | 5216  | 0.99 (0.38, 2.60)        |
| Q2 (0.013 - <0.046)                                                                                                                                                                        | 17                          | 5349  | 0.78 (0.36, 1.67)        | 15                                   | 5211  | 0.77 (0.31, 1.88)        | 10                                | 5232  | 1.04 (0.35, 3.06)        |
| Q3 (0.046 - <0.113)                                                                                                                                                                        | 28                          | 5403  | 1.23 (0.59, 2.56)        | 10                                   | 5297  | 0.47 (0.17, 1.34)        | 8                                 | 5344  | 0.69 (0.22, 2.15)        |
| Q4 (0.113 - 0.879)                                                                                                                                                                         | 23                          | 5433  | 0.87 (0.37, 2.03)        | 15                                   | 5298  | 0.51 (0.16, 1.55)        | 15                                | 5208  | 1.42 (0.55, 3.70)        |
| <i>P-trend</i>                                                                                                                                                                             |                             |       | 0.563                    |                                      |       | 0.256                    |                                   |       | 0.233                    |
| <b>Duration (years)</b>                                                                                                                                                                    |                             |       |                          |                                      |       |                          |                                   |       |                          |
| 10-year lag                                                                                                                                                                                |                             |       |                          |                                      |       |                          |                                   |       |                          |
| Unexposed                                                                                                                                                                                  | 48                          | 13010 | 1.00 (reference)         | 28                                   | 12882 | 1.00 (reference)         | 15                                | 12739 | 1.00 (reference)         |
| Q1 (1 - <4)                                                                                                                                                                                | 18                          | 7050  | 0.64 (0.29, 1.41)        | 12                                   | 6981  | 0.73 (0.24, 2.16)        | 12                                | 6957  | 1.06 (0.31, 3.60)        |
| Q2 (5 - <9)                                                                                                                                                                                | 28                          | 6003  | 1.60 (0.71, 3.57)        | 18                                   | 5849  | 1.06 (0.40, 2.82)        | 12                                | 5807  | 0.99 (0.33, 3.00)        |
| Q3 (10 - <15)                                                                                                                                                                              | 26                          | 6670  | 1.49 (0.66, 3.38)        | 13                                   | 6481  | 0.76 (0.27, 2.09)        | 10                                | 6451  | 0.83 (0.26, 2.62)        |
| Q4 (16 - 34)                                                                                                                                                                               | 32                          | 5708  | 1.93 (0.78, 4.79)        | 17                                   | 5526  | 0.84 (0.22, 3.16)        | 13                                | 5560  | 1.00 (0.26, 3.87)        |
| <i>P-trend</i>                                                                                                                                                                             |                             |       | 0.042                    |                                      |       | 0.842                    |                                   |       | 0.896                    |
| 15-year lag                                                                                                                                                                                |                             |       |                          |                                      |       |                          |                                   |       |                          |
| Unexposed                                                                                                                                                                                  | 50                          | 14258 | 1.00 (reference)         | 30                                   | 14095 | 1.00 (reference)         | 17                                | 13944 | 1.00 (reference)         |
| Q1 (1 - <4)                                                                                                                                                                                | 21                          | 7459  | 0.76 (0.37, 1.56)        | 13                                   | 7374  | 0.70 (0.26, 1.90)        | 10                                | 7353  | 0.71 (0.22, 2.28)        |
| Q2 (5 - <8)                                                                                                                                                                                | 25                          | 5404  | 1.51 (0.70, 3.29)        | 15                                   | 5261  | 0.87 (0.32, 2.37)        | 13                                | 5206  | 1.11 (0.40, 3.08)        |
| Q3 (9 - <13)                                                                                                                                                                               | 25                          | 5765  | 1.42 (0.64, 3.13)        | 11                                   | 5585  | 0.61 (0.22, 1.74)        | 7                                 | 5560  | 0.52 (0.17, 1.64)        |
| Q4 (14 - 34)                                                                                                                                                                               | 31                          | 5553  | 1.41 (0.60, 3.29)        | 19                                   | 5404  | 0.76 (0.23, 2.46)        | 15                                | 5450  | 0.98 (0.29, 3.30)        |
| <i>P-trend</i>                                                                                                                                                                             |                             |       | 0.223                    |                                      |       | 0.702                    |                                   |       | 0.901                    |
| 20-year lag                                                                                                                                                                                |                             |       |                          |                                      |       |                          |                                   |       |                          |
| Unexposed                                                                                                                                                                                  | 56                          | 16903 | 1.00 (reference)         | 32                                   | 16671 | 1.00 (reference)         | 18                                | 16514 | 1.00 (reference)         |
| Q1 (1 - <3)                                                                                                                                                                                | 20                          | 6323  | 0.90 (0.46, 1.76)        | 13                                   | 6250  | 0.97 (0.41, 2.26)        | 7                                 | 6173  | 0.71 (0.22, 2.31)        |
| Q2 (4 - <6)                                                                                                                                                                                | 17                          | 4679  | 1.06 (0.52, 2.19)        | 9                                    | 4525  | 0.72 (0.27, 1.91)        | 12                                | 4530  | 1.52 (0.58, 4.00)        |
| Q3 (7 - <11)                                                                                                                                                                               | 26                          | 5511  | 1.22 (0.60, 2.50)        | 14                                   | 5379  | 0.74 (0.30, 1.83)        | 11                                | 5372  | 0.94 (0.36, 2.46)        |
| Q4 (12 - 34)                                                                                                                                                                               | 33                          | 5023  | 1.38 (0.62, 3.06)        | 20                                   | 4894  | 0.86 (0.32, 2.30)        | 14                                | 4924  | 1.11 (0.38, 3.27)        |
| <i>P-trend</i>                                                                                                                                                                             |                             |       | 0.313                    |                                      |       | 0.737                    |                                   |       | 0.785                    |
| Abbreviations: C=Cases, PYs = Person years                                                                                                                                                 |                             |       |                          |                                      |       |                          |                                   |       |                          |
| <sup>a</sup> Adjusted for age (as the time scale), smoking, welding fumes, asbestos and crystalline silica.                                                                                |                             |       |                          |                                      |       |                          |                                   |       |                          |
| <sup>b</sup> Missing values in covariates were imputed.                                                                                                                                    |                             |       |                          |                                      |       |                          |                                   |       |                          |

## Most recent benzene exposure

| <b>Table S6.</b> Hazard Ratios (HR) of lung cancer according to most recent benzene exposure among males in the Norwegian Offshore Petroleum Workers (NOPW) cohort, 1999–2021. Based on extrapolated benzene exposure data during follow up among those employed in 1998. |              |                    |                               |                               |                               |
|---------------------------------------------------------------------------------------------------------------------------------------------------------------------------------------------------------------------------------------------------------------------------|--------------|--------------------|-------------------------------|-------------------------------|-------------------------------|
|                                                                                                                                                                                                                                                                           |              |                    | <b>Model 1<sup>a</sup></b>    | <b>Model 2<sup>b</sup></b>    | <b>Model 3<sup>c</sup></b>    |
| <b>Benzene metric</b>                                                                                                                                                                                                                                                     | <b>Cases</b> | <b>Person yrs.</b> | <b>HR<sup>d</sup>(95% CI)</b> | <b>HR<sup>d</sup>(95% CI)</b> | <b>HR<sup>d</sup>(95% CI)</b> |
| <b>Cumulative (ppm-years)</b>                                                                                                                                                                                                                                             |              |                    |                               |                               |                               |
| Unexposed                                                                                                                                                                                                                                                                 | 312          | 30378              | 1.00 (reference)              | 1.00 (reference)              | 1.00 (reference)              |
| Q1 (0.001 - <0.026)                                                                                                                                                                                                                                                       | 23           | 2646               | 0.90 (0.56, 1.45)             | 0.94 (0.57, 1.55)             | 0.77 (0.45, 1.31)             |
| Q2 (0.026 - <0.034)                                                                                                                                                                                                                                                       | 20           | 2756               | 0.69 (0.42, 1.13)             | 0.73 (0.44, 1.23)             | 0.66 (0.38, 1.15)             |
| Q3 (0.034 - <0.109)                                                                                                                                                                                                                                                       | 26           | 2618               | 1.07 (0.68, 1.67)             | 0.86 (0.53, 1.39)             | 0.75 (0.44, 1.27)             |
| Q4 (0.109 - 0.138)                                                                                                                                                                                                                                                        | 18           | 2663               | 0.68 (0.40, 1.15)             | 0.77 (0.45, 1.34)             | 0.71 (0.39, 1.26)             |
| <i>P-Trend</i>                                                                                                                                                                                                                                                            |              |                    | 0.167                         | 0.251                         | 0.160                         |
| <b>Most recent 10 years</b>                                                                                                                                                                                                                                               |              |                    |                               |                               |                               |
| Unexposed                                                                                                                                                                                                                                                                 | 290          | 27932              | 1.00 (reference)              | 1.00 (reference)              | 1.00 (reference)              |
| Q1 (0.000 - <0.034)                                                                                                                                                                                                                                                       | 31           | 3234               | 1.24 (0.82, 1.88)             | 1.33 (0.87, 2.04)             | 1.12 (0.71, 1.76)             |
| Q2 (0.034 - <0.067)                                                                                                                                                                                                                                                       | 30           | 3468               | 0.86 (0.57, 1.30)             | 0.93 (0.60, 1.44)             | 0.81 (0.51, 1.30)             |
| Q3 (0.067 - <0.149)                                                                                                                                                                                                                                                       | 25           | 3162               | 0.80 (0.51, 1.25)             | 0.66 (0.41, 1.05)             | 0.56 (0.34, 0.92)             |
| Q4 (0.149 - 0.279)                                                                                                                                                                                                                                                        | 23           | 3265               | 0.70 (0.44, 1.11)             | 0.78 (0.48, 1.26)             | 0.69 (0.41, 1.18)             |
| <i>P-trend</i>                                                                                                                                                                                                                                                            |              |                    | 0.078                         | 0.125                         | 0.060                         |
| <b>Most recent 15 years</b>                                                                                                                                                                                                                                               |              |                    |                               |                               |                               |
| Unexposed                                                                                                                                                                                                                                                                 | 261          | 24834              | 1.00 (reference)              | 1.00 (reference)              | 1.00 (reference)              |
| Q1 (0.000 - <0.043)                                                                                                                                                                                                                                                       | 39           | 3961               | 1.77 (1.24, 2.53)             | 1.83 (1.28, 2.60)             | 1.60 (1.10, 2.33)             |
| Q2 (0.043 - <0.097)                                                                                                                                                                                                                                                       | 31           | 4091               | 0.88 (0.59, 1.32)             | 0.88 (0.58, 1.33)             | 0.73 (0.46, 1.14)             |
| Q3 (0.097 - <0.180)                                                                                                                                                                                                                                                       | 41           | 4093               | 0.95 (0.66, 1.37)             | 0.87 (0.59, 1.28)             | 0.76 (0.49, 1.18)             |
| Q4 (0.180 - 0.441)                                                                                                                                                                                                                                                        | 27           | 4080               | 0.68 (0.44, 1.04)             | 0.73 (0.47, 1.14)             | 0.64 (0.39, 1.06)             |
| <i>P-trend</i>                                                                                                                                                                                                                                                            |              |                    | 0.050                         | 0.097                         | 0.045                         |
| <b>Intensity (ppm/years)</b>                                                                                                                                                                                                                                              |              |                    |                               |                               |                               |
| <b>Most recent 5 years</b>                                                                                                                                                                                                                                                |              |                    |                               |                               |                               |
| Unexposed                                                                                                                                                                                                                                                                 | 312          | 30378              | 1.00 (reference)              | 1.00 (reference)              | 1.00 (reference)              |
| Q1 (0.001 - <0.007)                                                                                                                                                                                                                                                       | 29           | 3268               | 0.88 (0.57, 1.35)             | 0.93 (0.59, 1.47)             | 0.78 (0.48, 1.28)             |
| Q2 (0.007 - <0.010)                                                                                                                                                                                                                                                       | 18           | 2080               | 0.87 (0.51, 1.47)             | 0.85 (0.49, 1.50)             | 0.73 (0.40, 1.31)             |
| Q3 (0.010 - <0.027)                                                                                                                                                                                                                                                       | 20           | 2634               | 0.89 (0.54, 1.48)             | 0.73 (0.43, 1.25)             | 0.66 (0.38, 1.17)             |
| Q4 (0.027 - 0.041)                                                                                                                                                                                                                                                        | 20           | 2700               | 0.68 (0.42, 1.12)             | 0.78 (0.47, 1.30)             | 0.70 (0.41, 1.22)             |
| <i>P-trend</i>                                                                                                                                                                                                                                                            |              |                    | 0.118                         | 0.203                         | 0.131                         |
| <b>Most recent 10 years</b>                                                                                                                                                                                                                                               |              |                    |                               |                               |                               |
| Unexposed                                                                                                                                                                                                                                                                 | 290          | 27932              | 1.00 (reference)              | 1.00 (reference)              | 1.00 (reference)              |
| Q1 (0.000 - <0.007)                                                                                                                                                                                                                                                       | 34           | 3291               | 1.22 (0.82, 1.82)             | 1.32 (0.86, 2.02)             | 1.10 (0.69, 1.74)             |
| Q2 (0.007 - <0.009)                                                                                                                                                                                                                                                       | 23           | 3255               | 0.67 (0.42, 1.06)             | 0.68 (0.42, 1.11)             | 0.58 (0.35, 0.98)             |
| Q3 (0.009 - <0.026)                                                                                                                                                                                                                                                       | 28           | 3277               | 1.04 (0.68, 1.60)             | 0.85 (0.54, 1.34)             | 0.76 (0.47, 1.24)             |
| Q4 (0.026 - 0.046)                                                                                                                                                                                                                                                        | 24           | 3305               | 0.69 (0.44, 1.09)             | 0.79 (0.49, 1.26)             | 0.72 (0.43, 1.20)             |
|                                                                                                                                                                                                                                                                           |              |                    | 0.104                         | 0.188                         | 0.095                         |
| <b>Most recent 15 years</b>                                                                                                                                                                                                                                               |              |                    |                               |                               |                               |
| Unexposed                                                                                                                                                                                                                                                                 | 261          | 24834              | 1.00 (reference)              | 1.00 (reference)              | 1.00 (reference)              |
| Q1 (0.000 - <0.007)                                                                                                                                                                                                                                                       | 42           | 4037               | 1.41 (0.98, 2.03)             | 1.46 (0.99, 2.15)             | 1.21 (0.79, 1.87)             |
| Q2 (0.007 - <0.008)                                                                                                                                                                                                                                                       | 33           | 4055               | 0.88 (0.60, 1.31)             | 0.97 (0.64, 1.45)             | 0.89 (0.57, 1.38)             |
| Q3 (0.008 - <0.021)                                                                                                                                                                                                                                                       | 33           | 4045               | 1.01 (0.69, 1.50)             | 0.81 (0.53, 1.23)             | 0.69 (0.43, 1.11)             |
| Q4 (0.021 - 0.049)                                                                                                                                                                                                                                                        | 30           | 4089               | 0.76 (0.51, 1.14)             | 0.84 (0.55, 1.28)             | 0.75 (0.47, 1.22)             |
| <i>P-trend</i>                                                                                                                                                                                                                                                            |              |                    | 0.184                         | 0.250                         | 0.110                         |
| <sup>a</sup> Adjusted for age (as the time scale).                                                                                                                                                                                                                        |              |                    |                               |                               |                               |
| <sup>b</sup> Adjusted for age (as the time scale), smoking                                                                                                                                                                                                                |              |                    |                               |                               |                               |
| <sup>c</sup> Adjusted for age (as the time scale), smoking, welding fumes, asbestos and crystalline silica (not extrapolated)                                                                                                                                             |              |                    |                               |                               |                               |
| <sup>d</sup> Missing values in covariates were imputed                                                                                                                                                                                                                    |              |                    |                               |                               |                               |



## Time-varying benzene exposure during follow-up

**Table S7.** Hazard Ratios (HR) of lung cancer according to time-varying benzene exposure among 25,347 males in the Norwegian Offshore Petroleum Workers (NOPW) cohort, 1999–2021. Based on extrapolated data during follow up among those employed in 1998.

|                                                                                                            |       |              | Model 1 <sup>a</sup>     | Model 2 <sup>b</sup>     | Model 3 <sup>c</sup>     |
|------------------------------------------------------------------------------------------------------------|-------|--------------|--------------------------|--------------------------|--------------------------|
| Benzene metric                                                                                             | Cases | Person years | HR <sup>d</sup> (95% CI) | HR <sup>d</sup> (95% CI) | HR <sup>d</sup> (95% CI) |
| <b>Cumulative (ppm-years)</b>                                                                              |       |              |                          |                          |                          |
| Unexposed                                                                                                  | 112   | 13034        | 1.00 (reference)         | 1.00 (reference)         | 1.00 (reference)         |
| Q1 (0.000 - <0.021)                                                                                        | 82    | 7012         | 1.40 (1.02, 1.91)        | 1.34 (0.96, 1.87)        | 1.48 (0.91, 2.42)        |
| Q2 (0.021 - <0.091)                                                                                        | 65    | 6952         | 1.32 (0.94, 1.83)        | 1.34 (0.94, 1.90)        | 1.40 (0.78, 2.53)        |
| Q3 (0.091 - <0.234)                                                                                        | 67    | 7018         | 1.13 (0.81, 1.56)        | 1.14 (0.81, 1.60)        | 1.20 (0.68, 2.12)        |
| Q4 (0.234-1.289)                                                                                           | 73    | 7045         | 1.10 (0.80, 1.51)        | 1.05 (0.75, 1.46)        | 1.03 (0.57, 1.86)        |
| <i>P-Trend</i>                                                                                             |       |              | 0.727                    | 0.551                    | 0.196                    |
| <b>Duration (years)</b>                                                                                    |       |              |                          |                          |                          |
| Unexposed                                                                                                  | 112   | 13034        | 1.00 (reference)         | 1.00 (reference)         | 1.00 (reference)         |
| Q1 (1 - <5)                                                                                                | 74    | 8166         | 1.10 (0.80, 1.51)        | 1.13 (0.81, 1.59)        | 1.33 (0.79, 2.25)        |
| Q2 (6 - <12)                                                                                               | 77    | 6365         | 1.71 (1.25, 2.36)        | 1.58 (1.12, 2.21)        | 1.66 (0.97, 2.83)        |
| Q3 (13 - <22)                                                                                              | 60    | 6647         | 1.33 (0.95, 1.85)        | 1.25 (0.89, 1.77)        | 1.32 (0.77, 2.28)        |
| Q4 (23-50)                                                                                                 | 76    | 6848         | 0.99 (0.72, 1.35)        | 0.99 (0.71, 1.37)        | 0.98 (0.56, 1.73)        |
| <i>P-trend</i>                                                                                             |       |              | 0.984                    | 0.909                    | 0.169                    |
| <sup>a</sup> Adjusted for age (as the time scale).                                                         |       |              |                          |                          |                          |
| <sup>b</sup> Adjusted for age (as the time scale), smoking                                                 |       |              |                          |                          |                          |
| <sup>c</sup> Adjusted for age (as the time scale), smoking, welding fumes, asbestos and crystalline silica |       |              |                          |                          |                          |
| <sup>d</sup> Missing values in covariates were imputed                                                     |       |              |                          |                          |                          |

**Lung cancer risk according to employment duration**

| <b>Table S8. Hazard ratios (HR) with 95% confidence intervals (CIs) of lung cancer according to employment duration among males in the Norwegian Offshore Petroleum Workers cohort, 1999–2021</b> |                            |                        |                                |
|---------------------------------------------------------------------------------------------------------------------------------------------------------------------------------------------------|----------------------------|------------------------|--------------------------------|
| <b>Cancer site</b>                                                                                                                                                                                | <b>Employment duration</b> | <b>Cases/Non Cases</b> | <b>HR<sup>a</sup> (95% CI)</b> |
| All lung (n= 399)                                                                                                                                                                                 | Q1 (0 - 4)                 | 81/435                 | 1.00 (reference)               |
|                                                                                                                                                                                                   | Q2 (5 - 10)                | 90/456                 | 1.03 (0.72, 1.47)              |
|                                                                                                                                                                                                   | Q3 (11 - 14)               | 65/338                 | 1.09 (0.74, 1.60)              |
|                                                                                                                                                                                                   | Q4 (15 - 19)               | 84/402                 | 0.97 (0.67, 1.40)              |
|                                                                                                                                                                                                   | Q5 (20 - 34)               | 79/404                 | 0.95 (0.66, 1.37)              |
|                                                                                                                                                                                                   | <i>P-Trend</i>             |                        | 0.72                           |
| Adenocarcinoma (n= 152)                                                                                                                                                                           | Q1 (0 - 4)                 | 30/441                 | 1.00 (reference)               |
|                                                                                                                                                                                                   | Q2 (5 - 10)                | 27/467                 | 0.85 (0.49, 1.49)              |
|                                                                                                                                                                                                   | Q3 (11 - 15)               | 30/424                 | 1.17 (0.68, 2.03)              |
|                                                                                                                                                                                                   | Q4 (16 - 20)               | 41/440                 | 1.29 (0.76, 2.18)              |
|                                                                                                                                                                                                   | Q5 (21 - 34)               | 24/311                 | 1.26 (0.69, 2.29)              |
|                                                                                                                                                                                                   | <i>P-Trend</i>             |                        | 0.183                          |
| Squamous cell carcinoma (n=88)                                                                                                                                                                    | Q1 (0 - 4)                 | 19/443                 | 1.00 (reference)               |
|                                                                                                                                                                                                   | Q2 (5 - 10)                | 24/465                 | 1.19 (0.61, 2.30)              |
|                                                                                                                                                                                                   | Q3 (11 - 14)               | 13/351                 | 0.91 (0.43, 1.94)              |
|                                                                                                                                                                                                   | Q4 (15 - 19)               | 19/414                 | 0.89 (0.44, 1.76)              |
|                                                                                                                                                                                                   | Q5 (20 - 34)               | 13/416                 | 0.61 (0.28, 1.31)              |
|                                                                                                                                                                                                   | <i>P-Trend</i>             |                        | 0.127                          |
| Small cell carcinoma (n=62)                                                                                                                                                                       | Q1 (0 - 4)                 | 13/445                 | 1.00 (reference)               |
|                                                                                                                                                                                                   | Q2 (5 - 10)                | 11/469                 | 0.78 (0.34, 1.84)              |
|                                                                                                                                                                                                   | Q3 (11 - 14)               | 13/351                 | 1.32 (0.57, 3.02)              |
|                                                                                                                                                                                                   | Q4 (15 - 20)               | 13/524                 | 0.71 (0.32, 1.62)              |
|                                                                                                                                                                                                   | Q5 (21 - 34)               | 12/315                 | 1.13 (0.51, 2.52)              |
|                                                                                                                                                                                                   | <i>P-Trend</i>             |                        | 0.972                          |
| Abbreviations: Q = Quartile                                                                                                                                                                       |                            |                        |                                |
| <sup>a</sup> adjusted for age, smoking, and education.                                                                                                                                            |                            |                        |                                |

**Table S9.** Spearman rank correlation Coefficients ( $r_{sp}$ ) for occupational co-exposures

| <b>Metric</b>                  | <b>Exposure</b>           | <i>Benzene</i> | <i>Crystalline silica</i> | <i>Diesel exhaust</i> | <i>Welding fumes</i> | <i>Asbestos</i> |
|--------------------------------|---------------------------|----------------|---------------------------|-----------------------|----------------------|-----------------|
| <b>Cumulative (ppm-years)</b>  | <i>Benzene</i>            | 1              |                           |                       |                      |                 |
|                                | <i>Crystalline silica</i> | 0.0376         | 1                         |                       |                      |                 |
|                                | <i>Diesel exhaust</i>     | 0.4059         | 0.3451                    | 1                     |                      |                 |
|                                | <i>Welding fumes</i>      | 0.6608         | 0.1256                    | 0.4020                | 1                    |                 |
|                                | <i>Asbestos</i>           | 0.6324         | 0.5119                    | 0.5211                | 0.3949               | 1               |
| <b>Duration (years)</b>        | <i>Benzene</i>            | 1              |                           |                       |                      |                 |
|                                | <i>Crystalline silica</i> | 0.2420         | 1                         |                       |                      |                 |
|                                | <i>Diesel exhaust</i>     | 0.5135         | 0.4430                    | 1                     |                      |                 |
|                                | <i>Welding fumes</i>      | 0.6360         | 0.2649                    | 0.5268                | 1                    |                 |
|                                | <i>Asbestos</i>           | 0.8026         | 0.4758                    | 0.4285                | 0.4745               | 1               |
| <b>Average intensity (ppm)</b> | <i>Benzene</i>            | 1              |                           |                       |                      |                 |
|                                | <i>Crystalline silica</i> | -0.0504        | 1                         |                       |                      |                 |
|                                | <i>Diesel exhaust</i>     | 0.3318         | 0.3246                    | 1                     |                      |                 |
|                                | <i>Welding fumes</i>      | 0.6175         | 0.0283                    | 0.3134                | 1                    |                 |
|                                | <i>Asbestos</i>           | 0.4356         | 0.5037                    | 0.5499                | 0.3110               | 1               |
